# Supplementary material
Source: PubMed Central journal article supplement (PMC4559265)
Supplement: NIHMS645762-supplement-01.pdf [file NIHMS645762-supplement-01.pdf]

## Appendix

## Supplementary Table 1

Baseline characteristics for the total cohort and by race–ethnic group according to incident AF status

|                                        | All participants |              | NHWs         |              | Chinese      |              | NHBs         |              | Hispanic     |              |
|----------------------------------------|------------------|--------------|--------------|--------------|--------------|--------------|--------------|--------------|--------------|--------------|
|                                        | AF               | No AF        | AF           | No AF        | AF           | No AF        | AF           | No AF        | AF           | No AF        |
| Mean age (SD)                          | 70.3 (8.0)       | 61.6 (10.1)  | 70.9 (7.0)   | 61.8 (10.1)  | 73.3 (8.1)   | 62.0 (10.2)  | 69.1 (9.8)   | 61.8 (10.0)  | 69.0 (8.3)   | 60.9 (10.3)  |
| Females (%)                            | 39.3             | 53.5         | 40.9         | 53.0         | *            | 51.0         | 39.1         | 55.8         | 26.9         | 52.7         |
| BMI >30                                | 32.8             | 32.3         | 29.8         | 27.6         | *            | 4.3          | 39.1         | 45.85        | 44.2         | 38.5         |
| Mean BMI (SD)                          | 28.7 (5.4)       | 28.3 (5.5)   | 28.6 (5.3)   | 27.7 (5.1)   | 24.9 (2.9)   | 23.9 (3.3)   | 28.9 (5.7)   | 30.2 (5.9)   | 30.0 (5.9)   | 29.4 (5.1)   |
| Hypertension (%)                       | 66.9             | 43.8         | 59.7         | 36.9         | *            | 36.6         | 79.7         | 58.8         | 73.1         | 40.4         |
| Diabetes (%)                           | 30.5             | 26.2         | 21.1         | 16.9         | *            | 29.7         | 40.6         | 32.1         | 46.2         | 32.7         |
| Mean total cholesterol (SD)            | 190.0 (36.4)     | 194.4 (35.7) | 189.7 (31.2) | 196.1 (35.4) | 183.5 (26.5) | 192.9 (31.9) | 183.9 (39.6) | 190.0 (36.2) | 201.0 (47.8) | 197.9 (37.0) |
| Hypertension medication (%)            | 57.6             | 36.0         | 50.6         | 31.5         | *            | 27.5         | 67.2         | 49.5         | 65.4         | 31.3         |
| Mean SBP (SD)                          | 135.8 (22.5)     | 126.1 (21.3) | 134.3 (21.4) | 122.5 (20.1) | 136.3 (24.1) | 124.2 (21.5) | 136.1 (23.8) | 131.5 (21.5) | 140.3 (23.9) | 126.2 (21.7) |
| Mean DBP (SD)                          | 72.0 (10.7)      | 71.9 (10.3)  | 70.7 (10.9)  | 70.2 (9.9)   | 69.6 (9.1)   | 72.1 (10.4)  | 74.0 (10.4)  | 74.6 (10.2)  | 74.5 (10.1)  | 71.5 (10.1)  |
| Mean glucose mg/dL (SD)                | 101.0 (39.4)     | 97.2 (29.7)  | 93.3 (22.9)  | 91.2 (21.4)  | 100.2 (22.7) | 98.8 (28.4)  | 107.8 (38.4) | 99.8 (31.8)  | 117.9 (70.6) | 103.1 (37.2) |
| Mean physical activity met min/wk (SD) | 4811 (4793)      | 5807 (5942)  | 4927 (4461)  | 5759 (5435)  | 2410 (1629)  | 3740 (3906)  | 5191 (6142)  | 6511 (6887)  | 4797 (4550)  | 6097 (6154)  |
| Mean total caloric intake kcal (SD)    | 1492 (696)       | 1534 (810)   | 1487 (721)   | 1566 (726)   | 1062 (370)   | 1174 (575)   | 1600 (686)   | 1589 (912)   | 1539 (667)   | 1625 (882)   |

BMI = body mass index.

\* Medicare data are not presented in these cells because of a small sample size.
